# Supplementary material
Source: Elsevier journal article supplement (https://comptes-rendus.academie-sciences.fr/chimie/article/10.1016/j.crci.2010.01.009/file/attach/mmc7.pdf)
Supplement: mmc7 [file mmc7.pdf]

**Electronic Supporting Information**

**Supramolecular Chemistry with Uranyl Tetrahalide  
([UO<sub>2</sub>X<sub>4</sub>]<sup>2-</sup>) Anions**

**Nicholas P. Deifel,<sup>a</sup> and Christopher L. Cahill\*<sup>a</sup>**

*<sup>a</sup> Department of Chemistry, The George Washington University, 725 21<sup>st</sup> Street NW, Washington, D.C. 20052. E-mail: cahill@gwu.edu*

## Synthesis of 2-5

### **[UO<sub>2</sub>Br<sub>4</sub>](C<sub>12</sub>H<sub>14</sub>N<sub>2</sub>) (2)**

Compound **2** was prepared by dissolving 0.128 g of UO<sub>2</sub>(CH<sub>3</sub>COO)<sub>2</sub>·2H<sub>2</sub>O in water (4.0 mL) and HBr (0.40 mL, 48% in H<sub>2</sub>O) in a 25 mL Erlenmeyer flask. To this yellow solution, 1,2-bis(4-pyridyl)ethane (0.051 g) was added. The resulting mixture was evaporated using gentle heat to an approximate volume of 2 mL and allowed to cool. The flask was then covered with a piece of Parafilm into which several holes were punched. After 45 days X-ray quality crystals were obtained.

### **[UO<sub>2</sub>Br<sub>4</sub>](C<sub>12</sub>H<sub>12</sub>N<sub>2</sub>) (3)**

Compound **3** was prepared by dissolving 0.256 g of UO<sub>2</sub>(CH<sub>3</sub>COO)<sub>2</sub>·2H<sub>2</sub>O in water (2.5 mL) and HBr (0.75 mL, 48% in H<sub>2</sub>O) in a 25 mL Erlenmeyer flask. To this yellow solution, trans-1,2-bis(4-pyridyl)ethylene (0.250 g) in water (2.5 mL) and HBr (0.75 mL, 48% in H<sub>2</sub>O) was added. The resulting mixture was evaporated using gentle heat to an approximate volume of 4 mL and allowed to cool. The flask was then covered with a piece of Parafilm into which several holes were punched. After 2.5 months, yellow, X-ray quality crystals were obtained as a mixture with white solids. These were easily physically separated under magnification.

### **[UO<sub>2</sub>Br<sub>4</sub>](C<sub>10</sub>H<sub>11</sub>N<sub>3</sub>)<sub>2</sub>·2Br·2H<sub>2</sub>O (4)**

Compound **4** was prepared by dissolving 0.258 g of UO<sub>2</sub>(CH<sub>3</sub>COO)<sub>2</sub>·2H<sub>2</sub>O in water (2.5 mL) and HBr (0.75 mL, 48% in H<sub>2</sub>O) in a 25 mL Erlenmeyer flask. To this yellow solution, 4,4'-dipyridylamine (0.239 g) in water (2.5 mL) and HBr (0.75 mL, 48% in H<sub>2</sub>O) was added. The resulting mixture was evaporated using gentle heat to an approximate volume of 4 mL and allowed to cool. The flask was then covered with a piece of Parafilm into which several holes were punched. After 2.5 months, large X-ray quality crystals were obtained.

### **[UO<sub>2</sub>Br<sub>4</sub>](C<sub>13</sub>H<sub>16</sub>N<sub>2</sub>)<sub>2</sub>·2Br (5)**

Compound **5** was prepared by dissolving 0.261 g of UO<sub>2</sub>(CH<sub>3</sub>COO)<sub>2</sub>·2H<sub>2</sub>O in water (2.5 mL) and HBr (0.75 mL, 48% in H<sub>2</sub>O) in a 25 mL Erlenmeyer flask. To this yellow solution, 4,4'-trimethylene dipyridine (0.236 g) in water (2.5 mL) and HBr (0.75 mL, 48% in H<sub>2</sub>O) was added. The resulting mixture was evaporated using gentle heat to an approximate volume of 4 mL and allowed to cool. The flask was then covered with a piece of Parafilm into which several holes were punched. After 2.5 months, yellow-orange, X-ray quality crystals were obtained.

**Table S1a.** Hydrogen bonds for **1a** [A and deg.].

---

| D-H...A             | d(D-H) | d(H...A) | d(D...A) | <(DHA) |
|---------------------|--------|----------|----------|--------|
| N(1)-H(1)...Br(1)#3 | 0.86   | 2.62     | 3.319(4) | 139.6  |
| N(1)-H(1)...Br(2)#3 | 0.86   | 3.08     | 3.704(4) | 131.1  |

---

Symmetry transformations used to generate equivalent atoms:

#1 -x,-y,-z #2 -x+2,-y+1,-z+1 #3 x,y+1,z

**Table S2.** Hydrogen bonds for **2** [A and deg.].

---

| D-H...A             | d(D-H) | d(H...A) | d(D...A) | <(DHA) |
|---------------------|--------|----------|----------|--------|
| N(1)-H(1)...Br(2)#3 | 0.86   | 2.77     | 3.456(3) | 137.4  |
| N(1)-H(1)...Br(1)#3 | 0.86   | 2.84     | 3.468(3) | 131.1  |

---

Symmetry transformations used to generate equivalent atoms:

#1 -x,-y,-z #2 -x,-y+1,-z+1 #3 -x+1,-y+1,-z

**Table S3.** Hydrogen bonds for **3** [A and deg.].

---

| D-H...A             | d(D-H) | d(H...A) | d(D...A) | <(DHA) |
|---------------------|--------|----------|----------|--------|
| N(1)-H(1)...Br(1)#3 | 0.86   | 2.71     | 3.459(3) | 146.4  |
| N(1)-H(1)...Br(2)#3 | 0.86   | 2.94     | 3.487(3) | 122.9  |

---

Symmetry transformations used to generate equivalent atoms:

#1 -x,-y,-z #2 -x-1,-y+1,-z+1 #3 x+1,y,z

**Table S4.** Hydrogen bonds for **4** [A and deg.].

---

| D-H...A             | d(D-H)  | d(H...A) | d(D...A) | <(DHA) |
|---------------------|---------|----------|----------|--------|
| N(1)-H(1)...Br(1)#2 | 0.86    | 2.72     | 3.455(4) | 144.0  |
| N(1)-H(1)...Br(3)#2 | 0.86    | 3.06     | 3.620(5) | 124.4  |
| N(3)-H(3)...OW1#3   | 0.86    | 1.90     | 2.724(5) | 159.8  |
| N(2)-HN2...Br(3)#4  | 0.73(4) | 2.65(4)  | 3.374(4) | 171(4) |

---

Symmetry transformations used to generate equivalent atoms:

#1 -x+2,-y,-z+2 #2 -x+1,-y,-z+1 #3 x,y,z+1

#4 -x+1,-y+1,-z+1

**Table S5.** Hydrogen bonds for **5** [A and deg.].

---

| D-H...A             | d(D-H) | d(H...A) | d(D...A) | <(DHA) |
|---------------------|--------|----------|----------|--------|
| N(1)-H(1)...Br(3)#2 | 0.86   | 2.41     | 3.221(8) | 157.5  |
| N(2)-H(2)...Br(3)   | 0.86   | 2.34     | 3.187(6) | 168.1  |

---

Symmetry transformations used to generate equivalent atoms:

#1 -x,-y,-z #2 x,y-1,z+1
